# Supplementary material
Source: PubMed Central journal article supplement (PMC1892938)

Growth (600nm)

Glucose

Mannose

Galactose

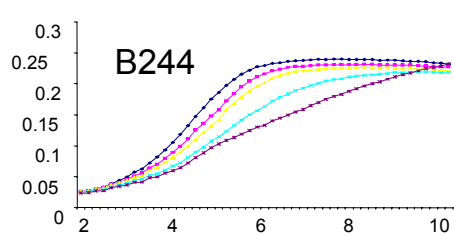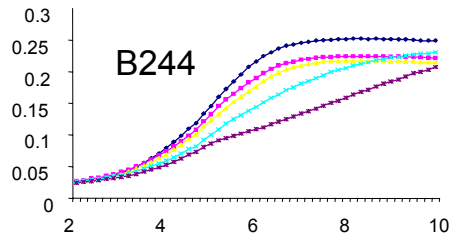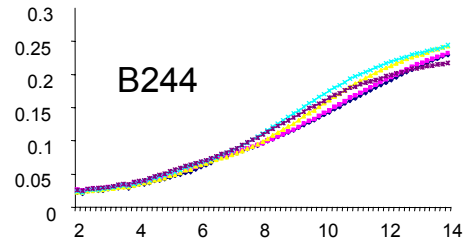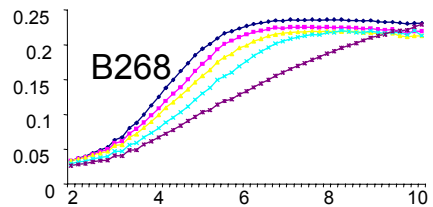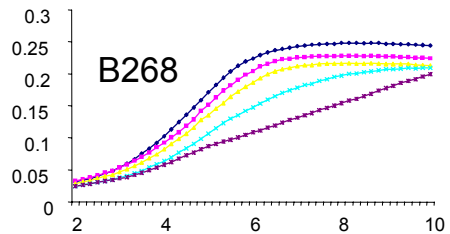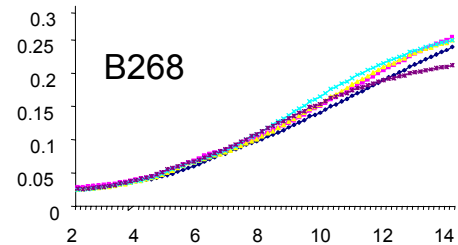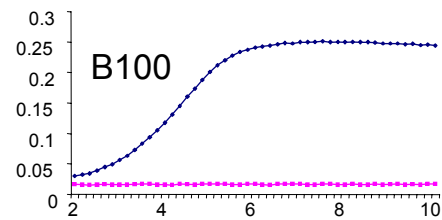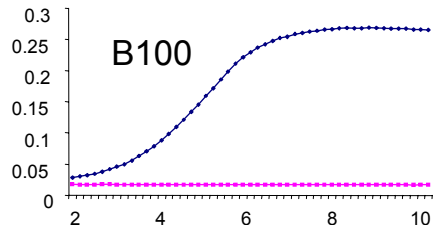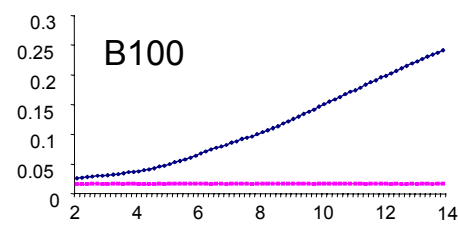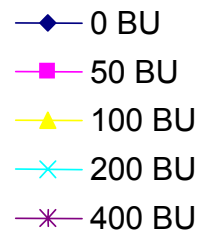

Time (h)

Supplement: pnas_0608775104_3.pdf [file pnas_0608775104_3.pdf]
